# Supplementary material for: Dinuclear organogermanium chalcogenide complexes as intermediates towards functionalized clusters
Source: Royal Society of Chemistry journal article supplement (doi:10.1039/c9dt00310j), 2019-01-01
Supplement: c9dt00310j1.pdf [file c9dt00310j1.pdf]

# Dinuclear organogermanium chalcogenide complexes as intermediates towards functionalized clusters

Eike Dornsiepen and Stefanie Dehnen\*

*Fachbereich Chemie and Wissenschaftliches Zentrum für Materialwissenschaften, Philipps-Universität Marburg, Hans-Meerwein-Straße, D-35043 Marburg, Germany*

## SUPPORTING INFORMATION

### Content

- 1) NMR spectra
- 2) Mass spectra
- 3) IR spectra
- 4) Solution UV-Vis spectra
- 5) Single-crystal X-ray Crystallography of Compound 1
- 6) Single-crystal X-ray Crystallography of Compound 2
- 7) Single-crystal X-ray Crystallography of Compound 3
- 8) References for the Supporting Information

## 1. NMR spectra

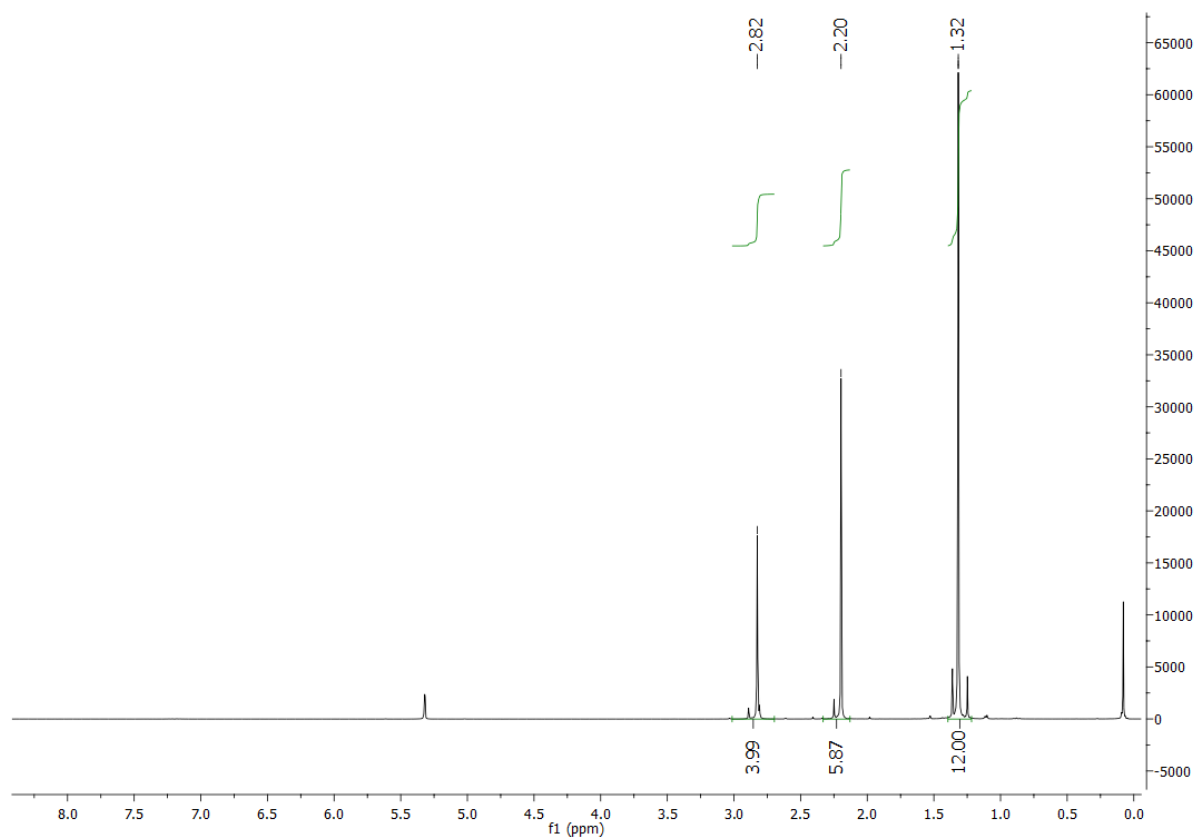

**Figure S1:**  $^1\text{H-NMR}$  spectrum of **1** (300 MHz,  $\text{CD}_2\text{Cl}_2$ ).

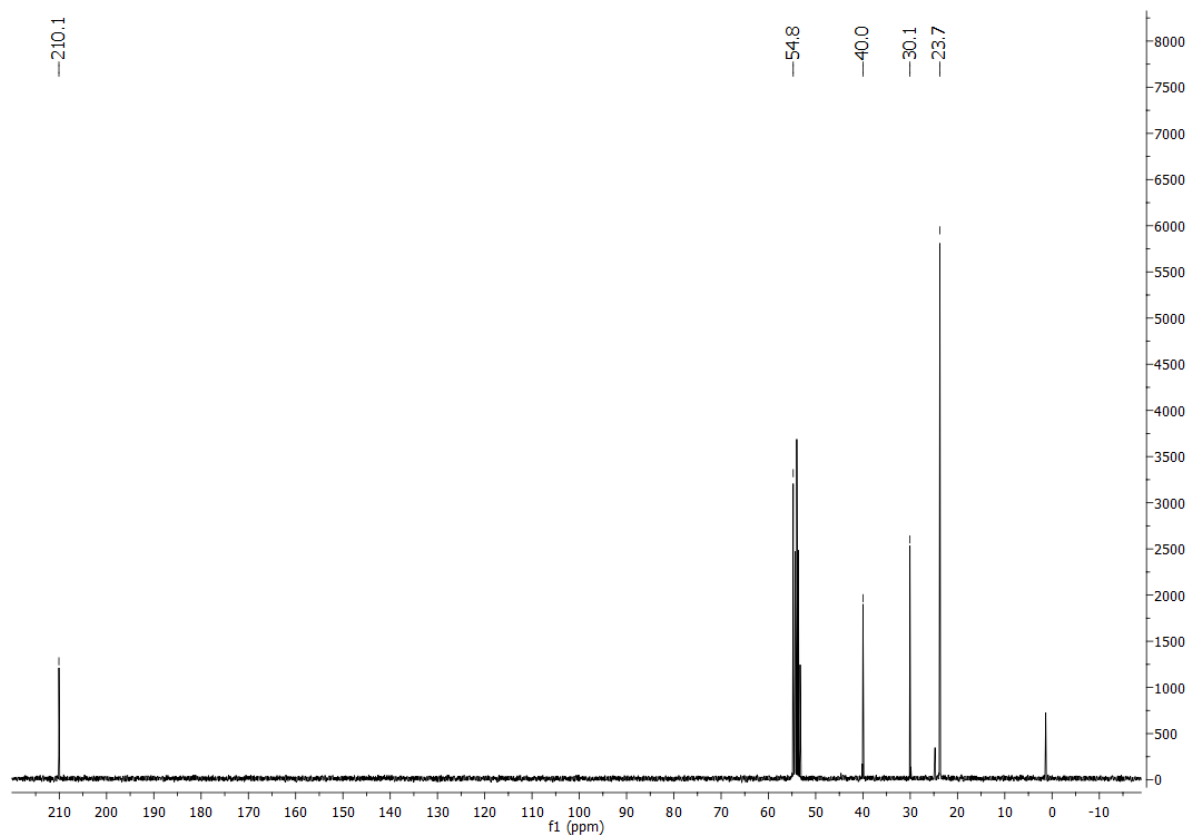

**Figure S2:**  $^{13}\text{C}\{^1\text{H}\}$ -NMR spectrum of **1** (75 MHz,  $\text{CD}_2\text{Cl}_2$ ).

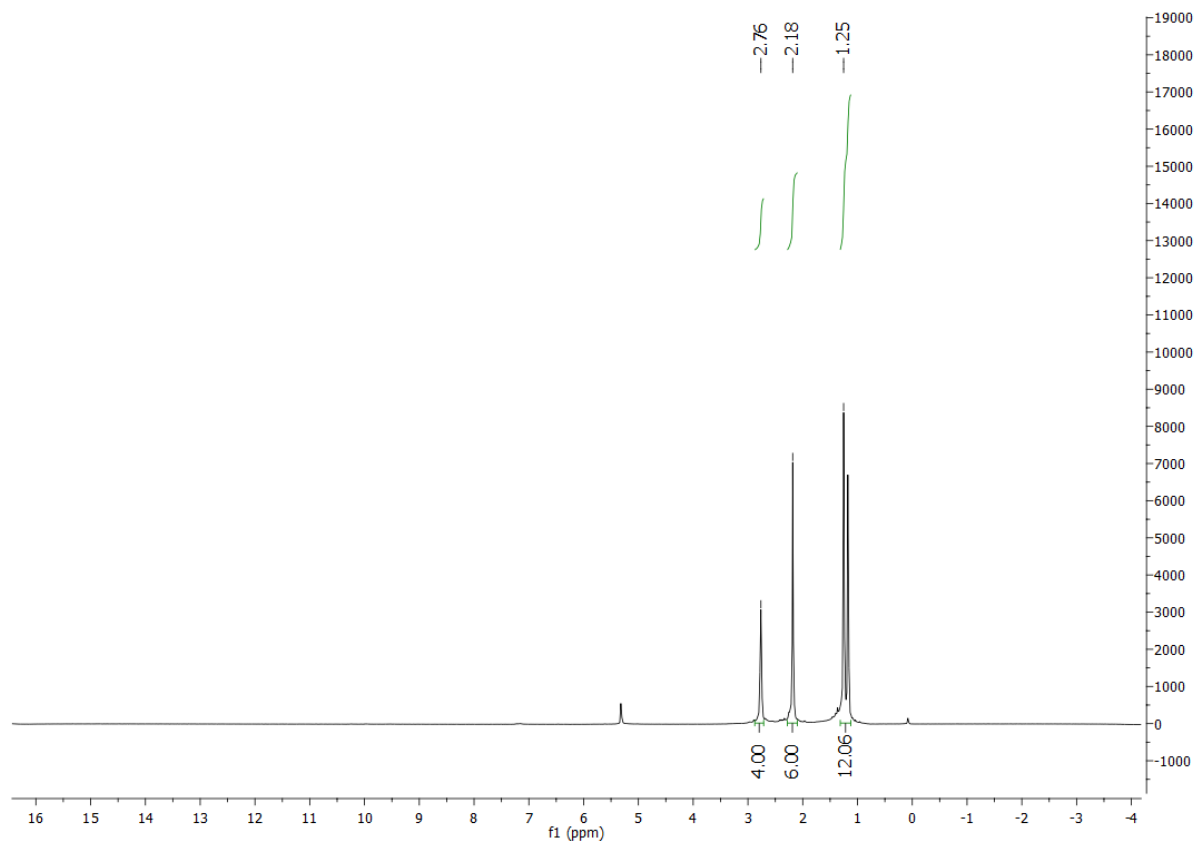

**Figure S3:**  $^1\text{H-NMR}$  spectrum of **2** (300 MHz,  $\text{CD}_2\text{Cl}_2$ ).

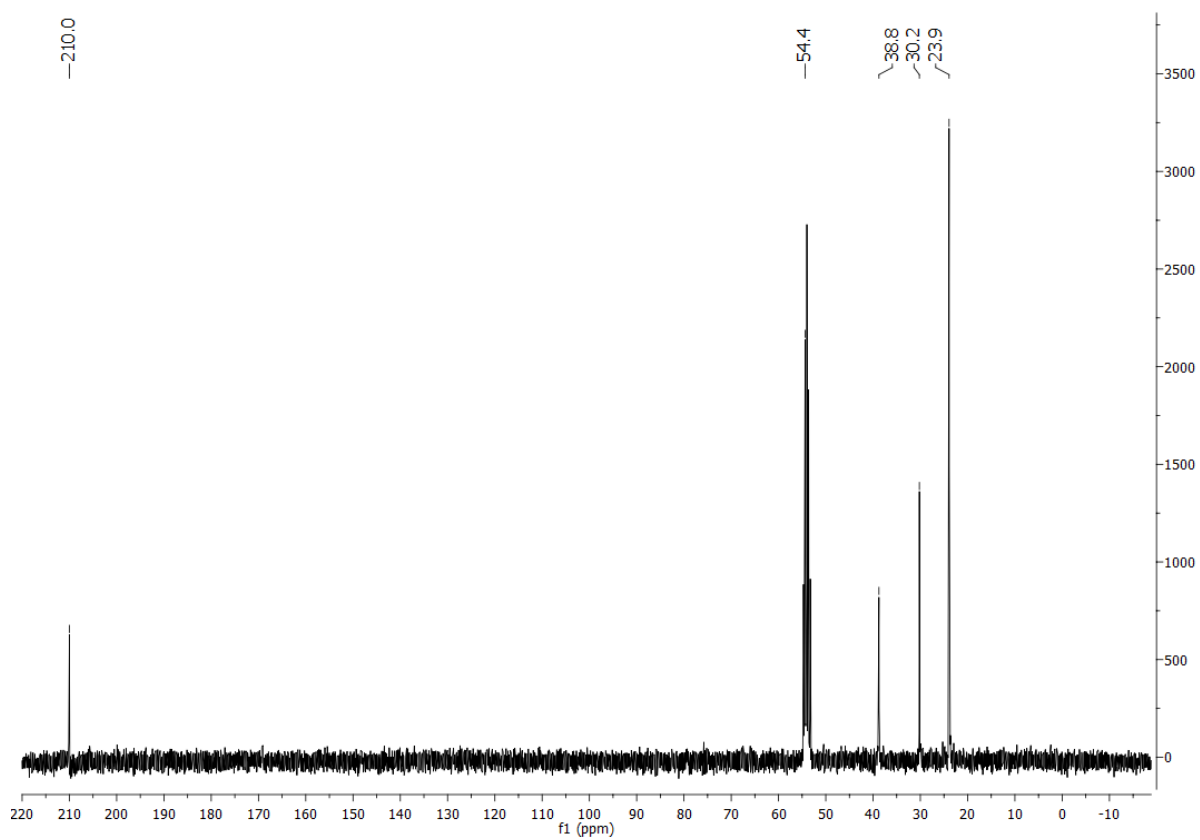

**Figure S4:**  $^{13}\text{C}\{^1\text{H}\}$ -NMR spectrum of **2** (75 MHz,  $\text{CD}_2\text{Cl}_2$ ).

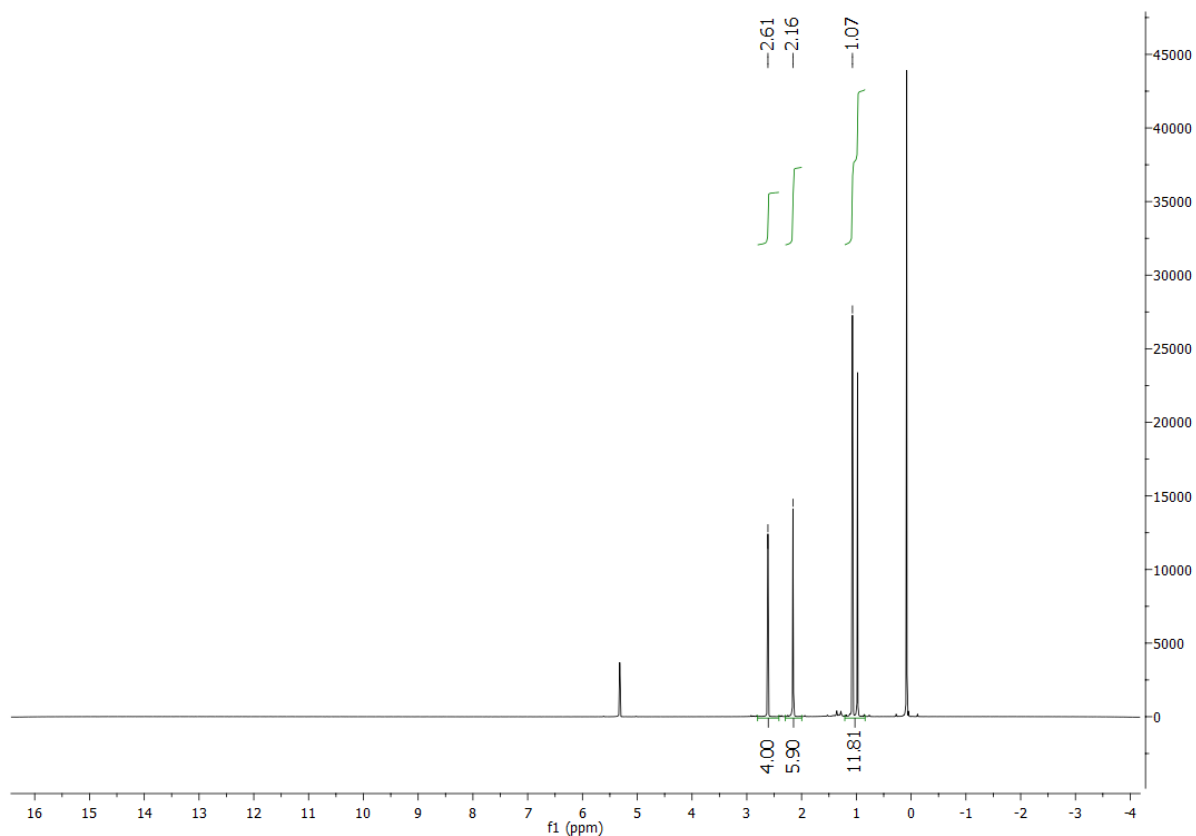

**Figure S5:**  $^1\text{H-NMR}$  spectrum of **3** (300 MHz,  $\text{CD}_2\text{Cl}_2$ ).

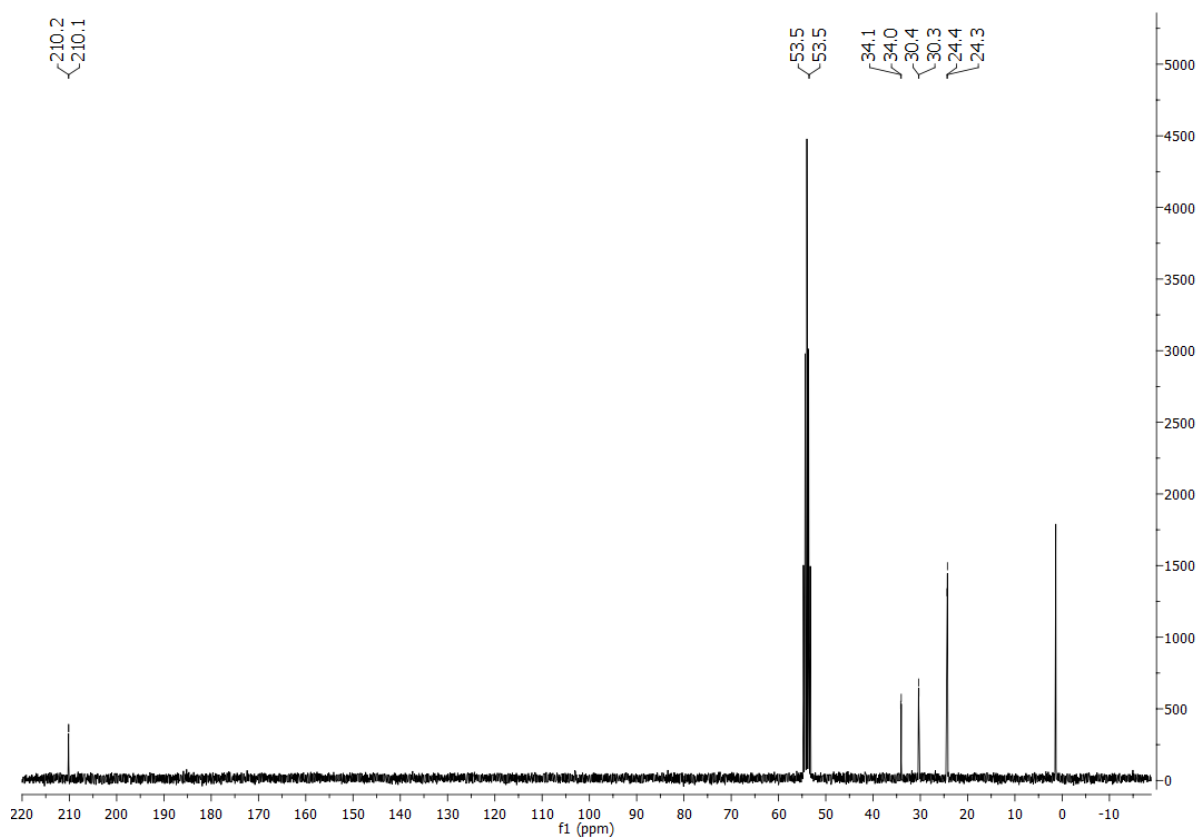

**Figure S6:**  $^{13}\text{C}\{^1\text{H}\}$ -NMR spectrum of **3** (300 MHz,  $\text{CD}_2\text{Cl}_2$ ).

## 2. Mass spectra

O:\LTQ-FT\0119\Dehnen\190109\_SY\_367\_De

1/14/2019 10:02:31 AM

190109\_SY\_367\_De #58 RT: 1.34 AV: 1 SM: 7B NL: 6.88E4

F: FTMS + p ESI Full ms [100.00-1000.00]

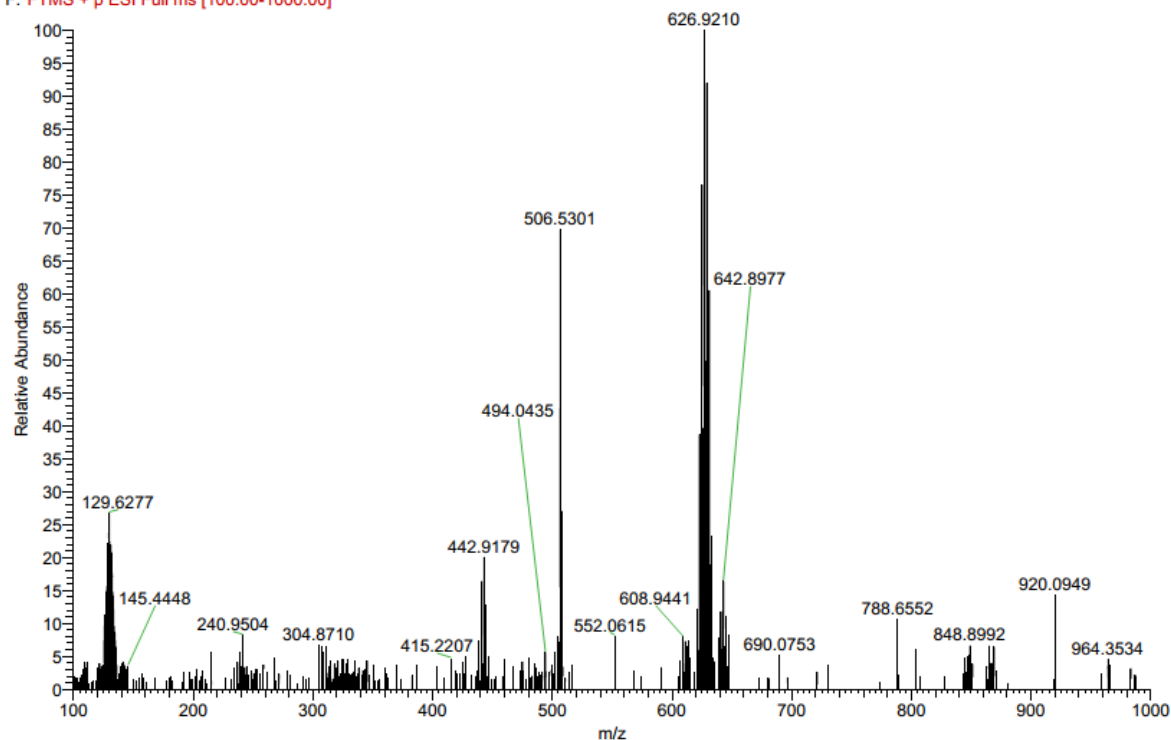

Figure S7: ESI(+) mass spectrum of **1**.

O:\LTQ-FT\0119\Dehnen\190109\_SY\_367\_De

1/14/2019 10:02:31 AM

SM: 7B

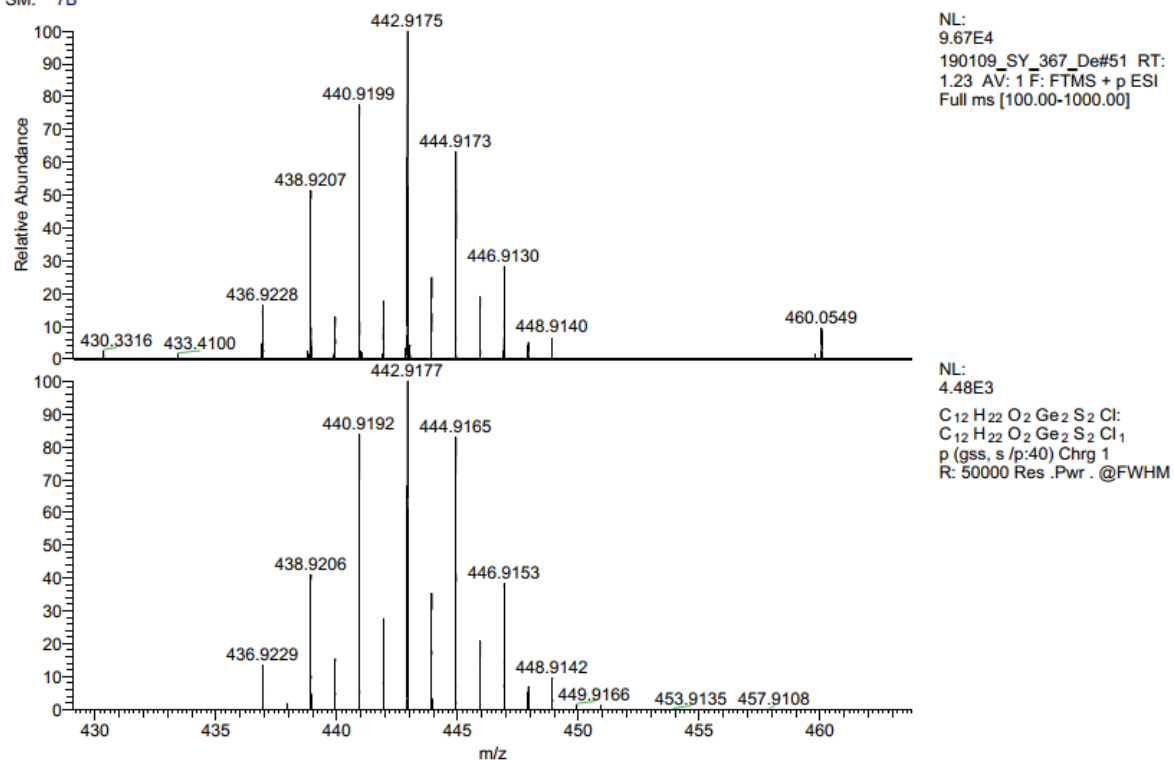

Figure S8: HRMS from the signal at 442.9175 m/z corresponding to the sum formula [C<sub>12</sub>H<sub>22</sub>O<sub>2</sub>Ge<sub>2</sub>S<sub>2</sub>Cl]<sup>+</sup>.

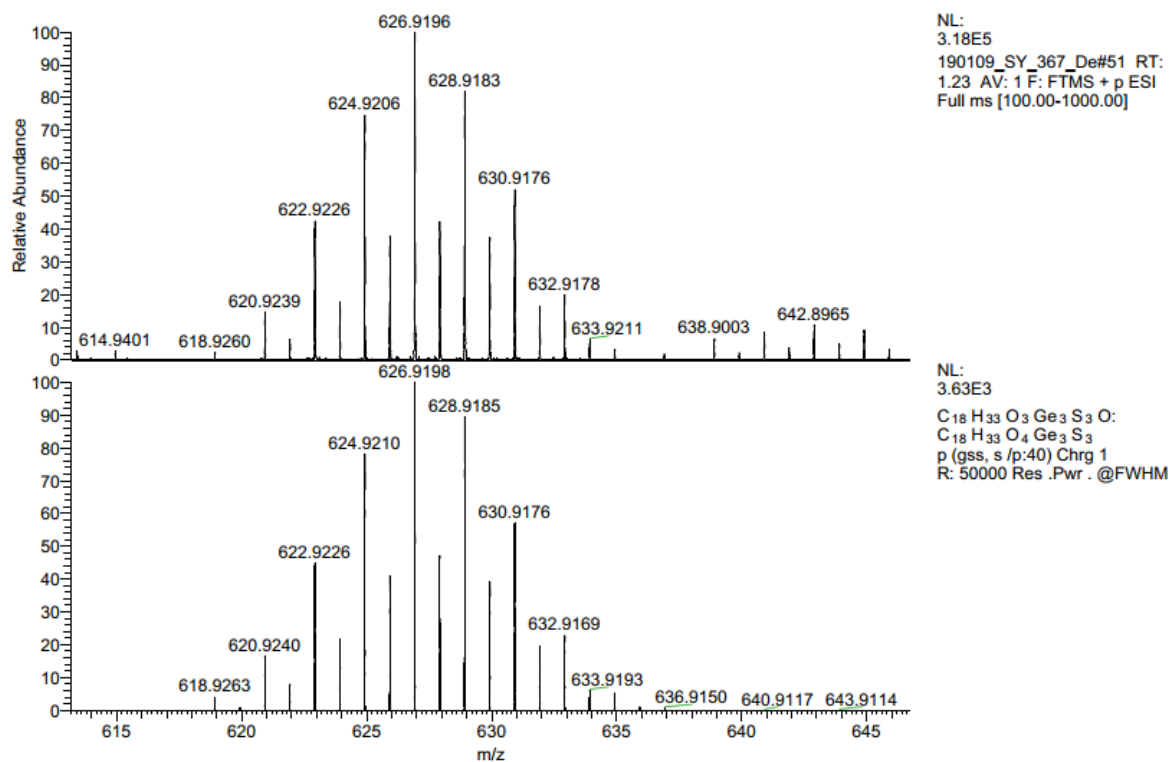

**Figure S9:** HRMS from the signal at 626.9196 m/z corresponding to the sum formula  $[C_{18}H_{33}O_3Ge_3S_3O]^+$ , formed by hydrolysis of **1** due to water traces in the mass spectrometer.

190109\_SY\_368\_De #114 RT: 2.84 AV: 1 SM: 7B NL: 3.02E5  
F: FTMS - p ESI Full ms [100.00-1000.00]

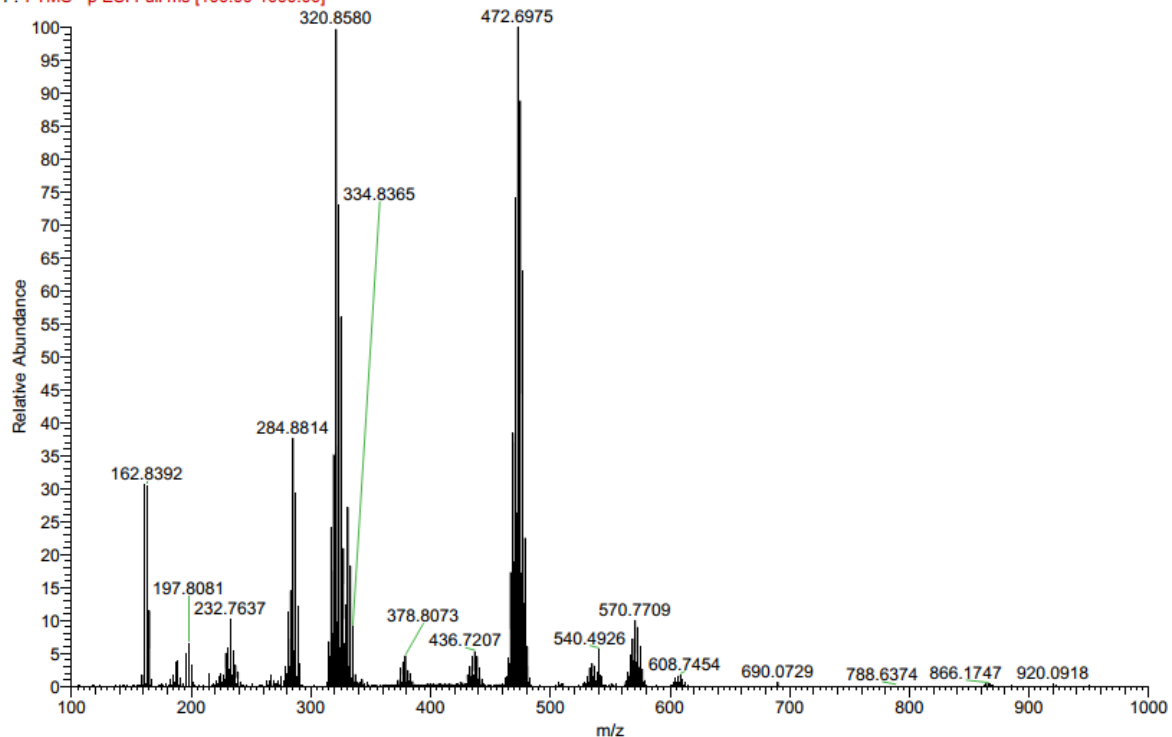

**Figure S10:** ESI(-) mass spectrum of **2**.

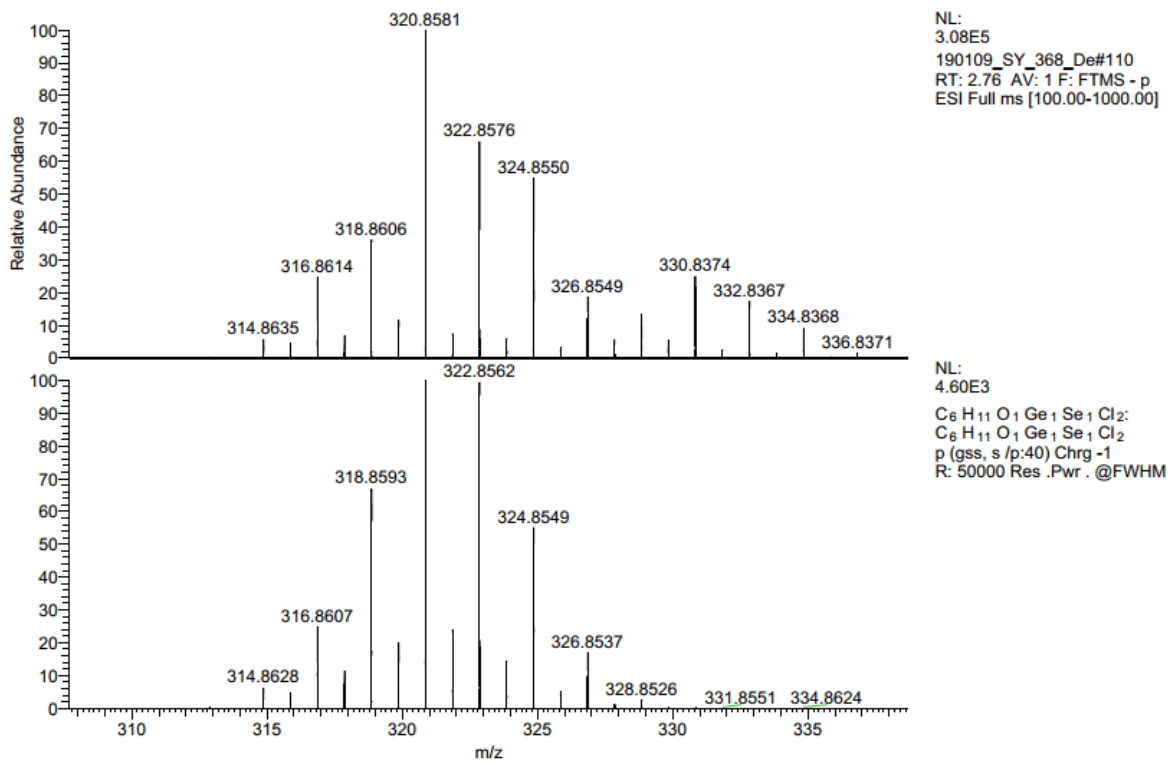

**Figure S11:** HRMS from the signal at 320.8581 m/z corresponding to the sum formula [C<sub>6</sub>H<sub>11</sub>O<sub>1</sub>Ge<sub>1</sub>Se<sub>1</sub>Cl<sub>2</sub>]<sup>-</sup>.

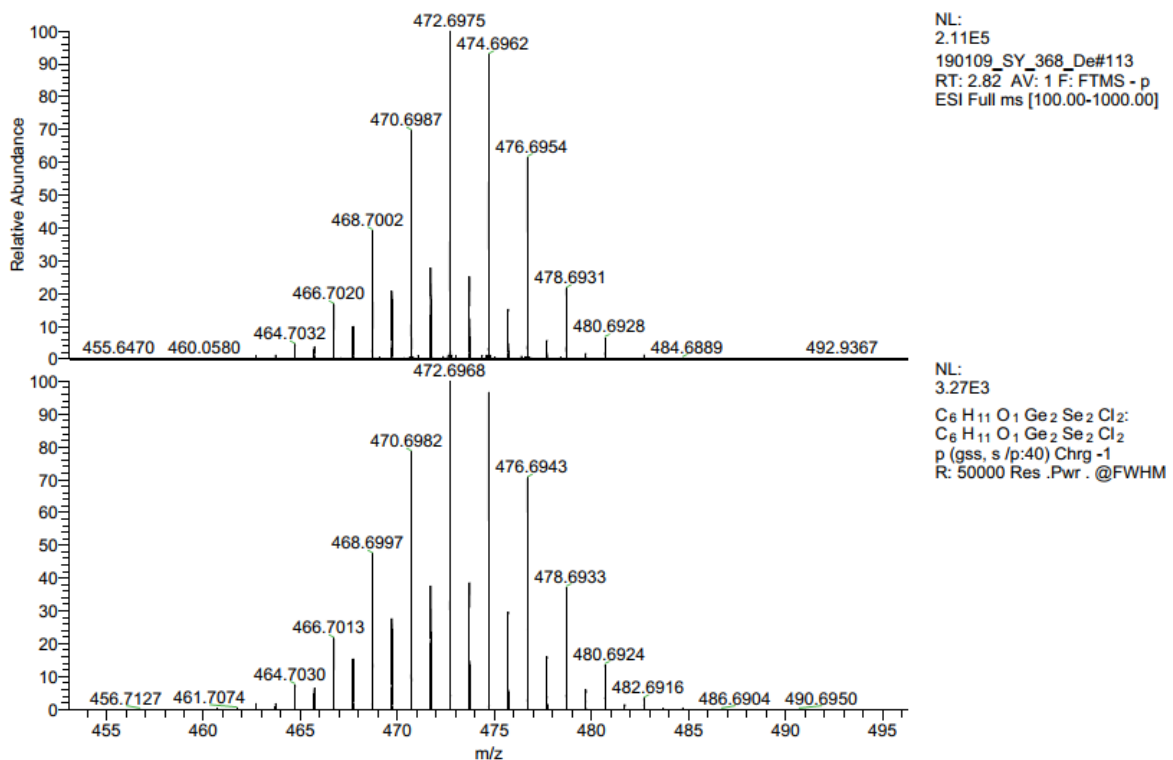

**Figure S12:** HRMS from the signal at 472.6975 m/z corresponding to the sum formula [C<sub>6</sub>H<sub>11</sub>O<sub>1</sub>Ge<sub>2</sub>Se<sub>2</sub>Cl<sub>2</sub>]<sup>-</sup>.

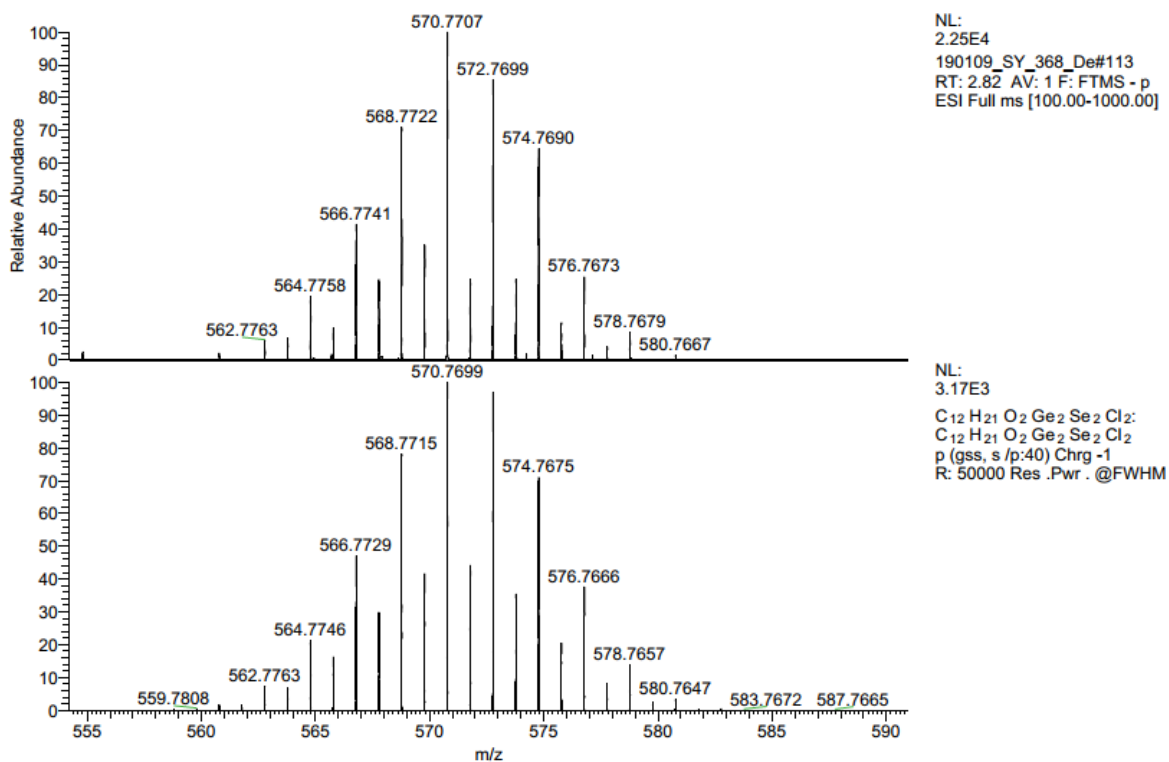

**Figure S13:** HRMS from the signal at 570.7707 m/z corresponding to the sum formula [C<sub>12</sub>H<sub>21</sub>O<sub>2</sub>Ge<sub>2</sub>Se<sub>2</sub>Cl<sub>2</sub>].

190109\_SY\_369\_De #52 RT: 0.89 AV: 1 SM: 7B NL: 1.60E5  
F: FTMS + p ESI Full ms [100.00-1000.00]

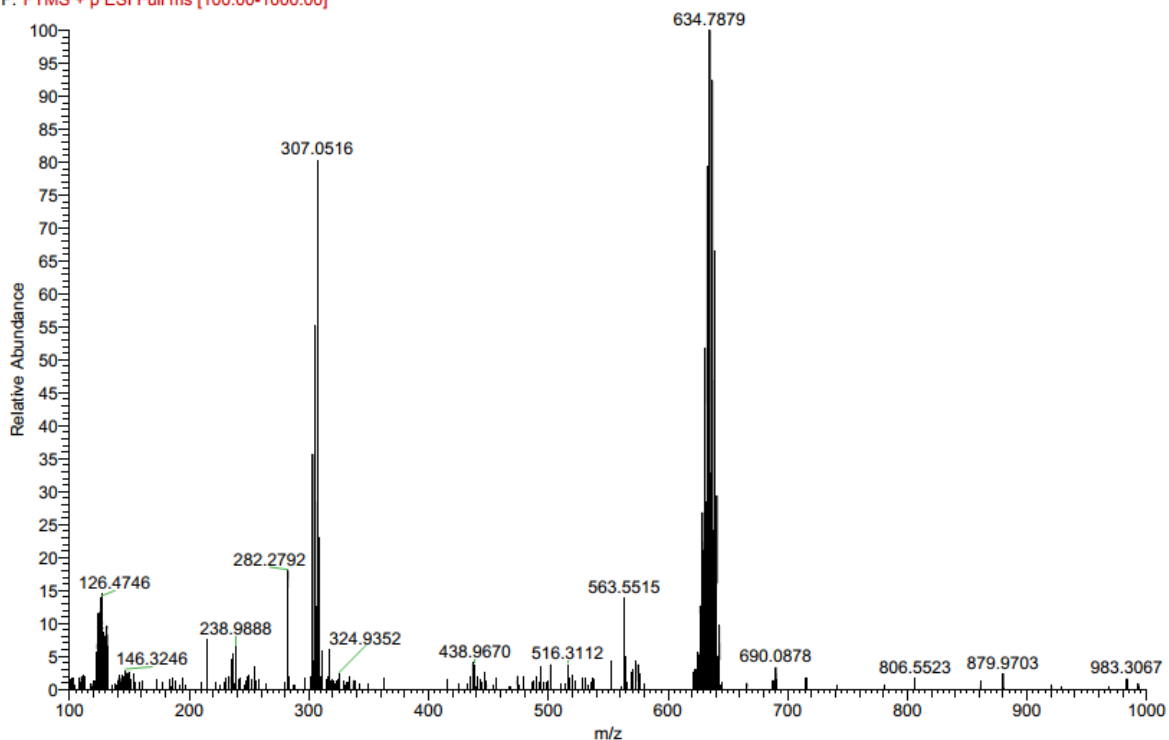

**Figure S14:** ESI(+) mass spectrum of 3.



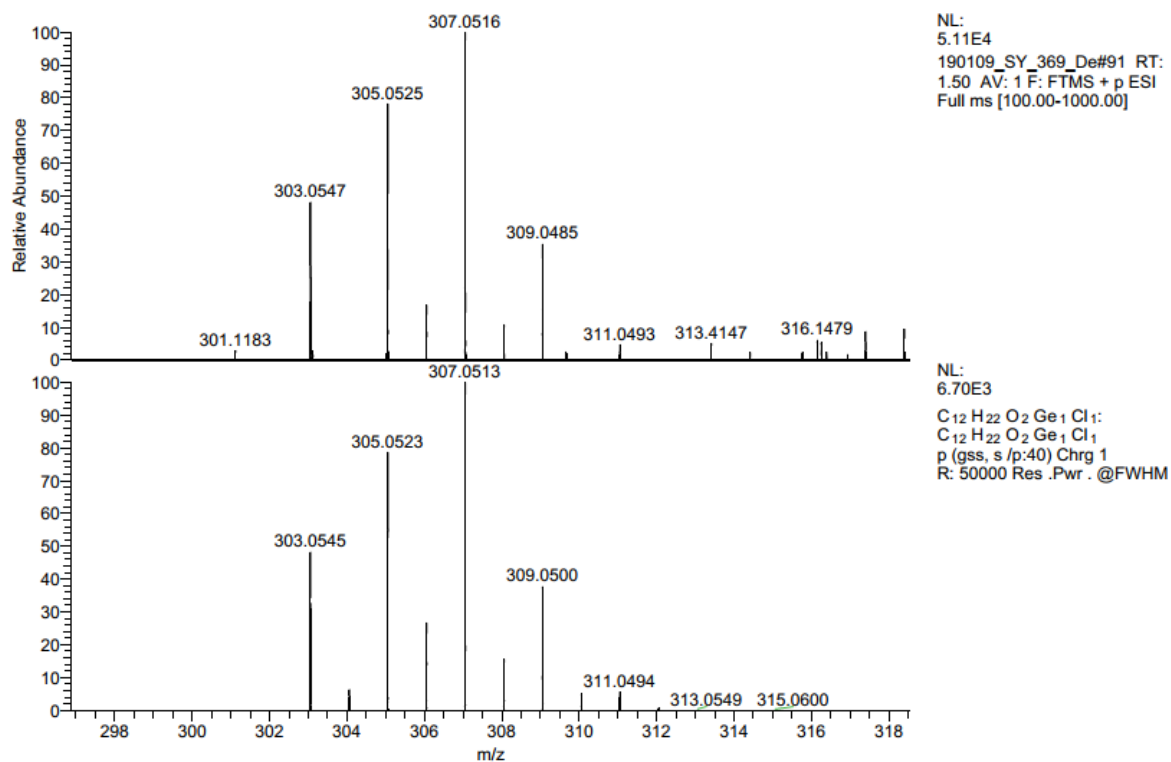

**Figure S15:** HRMS from the signal at 307.0516 m/z corresponding to the sum formula  $[C_{12}H_{22}O_2GeCl]^{+}$ .

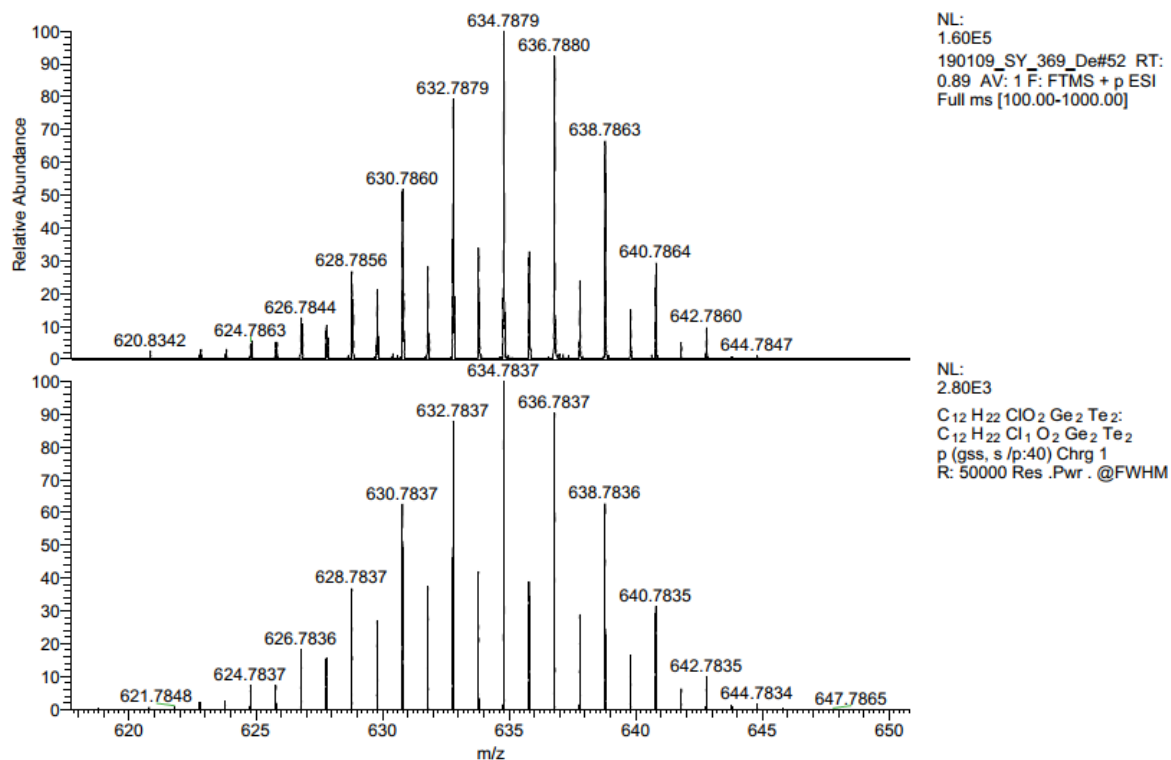

**Figure S16:** HRMS from the signal at 634.7879 m/z corresponding to the sum formula  $[C_{12}H_{21}O_2Ge_2Te_2Cl]^{+}$ .

### 3. IR spectra

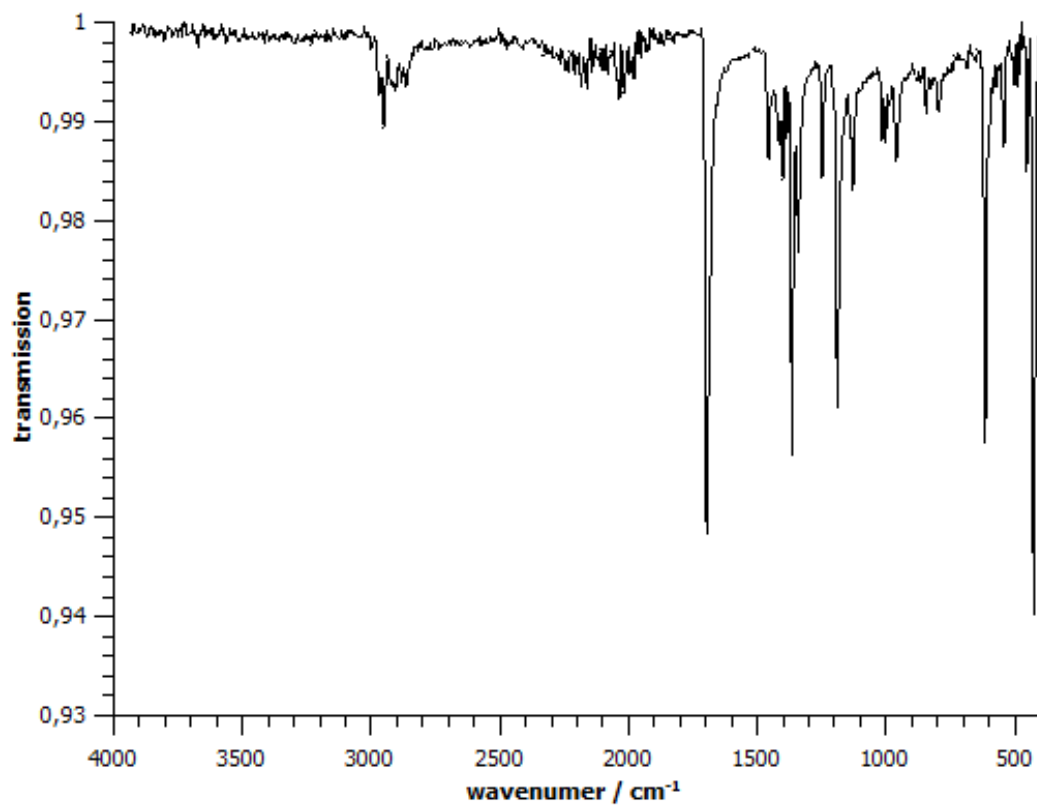

Figure S17: IR spectrum of 1.

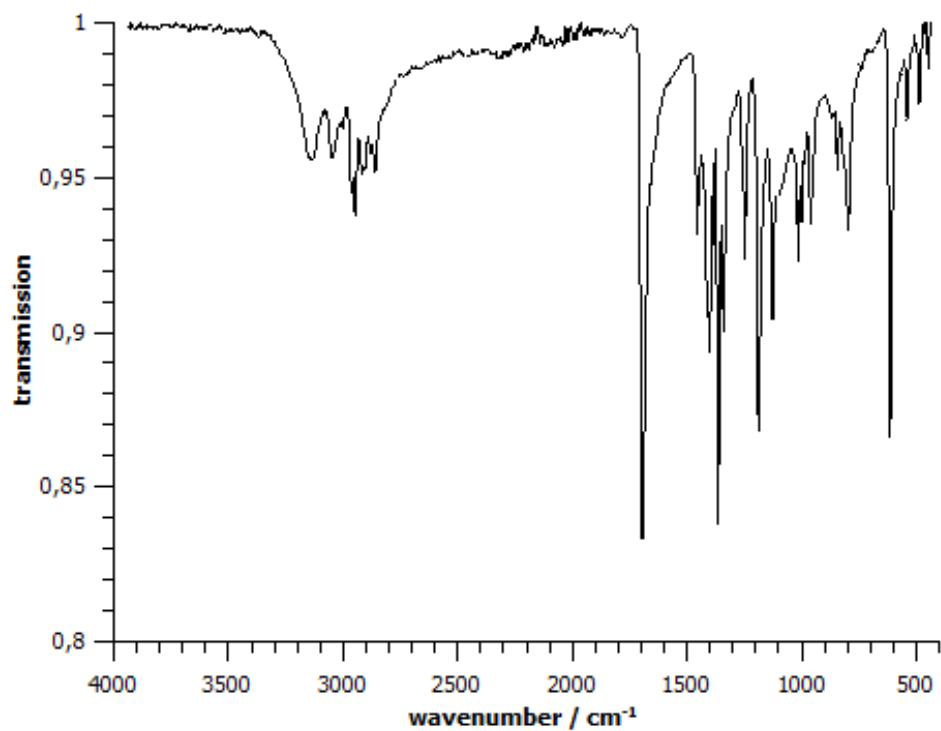

Figure S18: IR spectrum of 2.

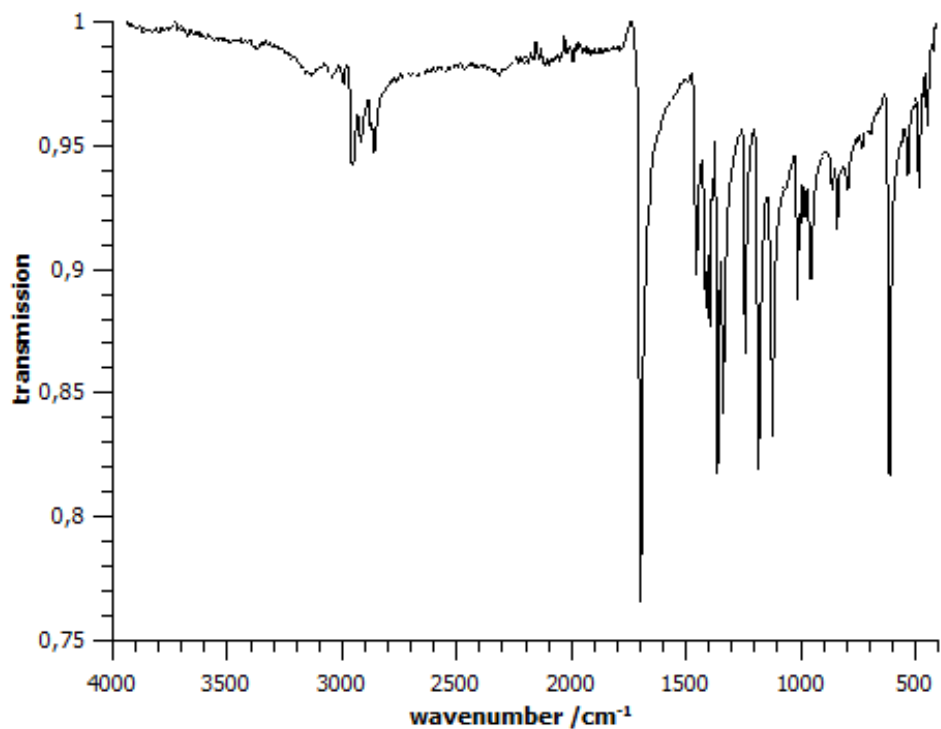

Figure S19: IR spectrum of 3.

#### 4. Solution UV-Vis Spectra

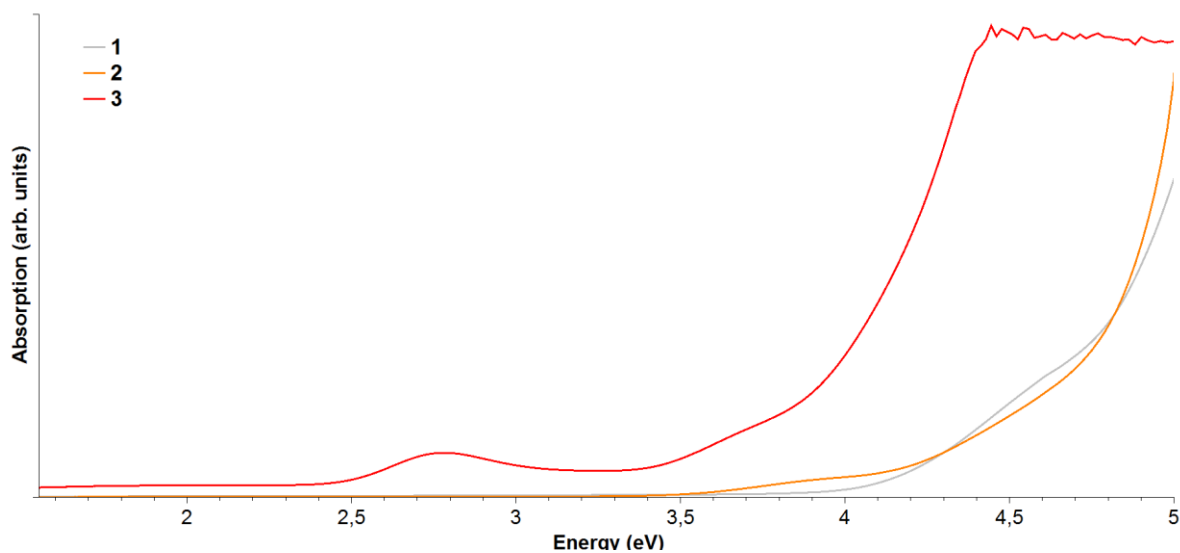

Figure S20: UV-Vis spectra of compounds 1–3. The spectra were recorded in dichloromethane solutions ( $c = 2$  mg/mL).

## 5. Single-crystal X-ray Crystallography of Compound 1

Compound **1** crystallizes as colorless blocks. Data of the X-Ray diffraction analyses were collected on a STOE IPDS 2T imaging plate diffractometer using  $\text{MoK}\alpha$  radiation with graphite monochromatization ( $\lambda = 0.71073 \text{ \AA}$ ) at 100 K. Reflection data were processed with X-Area 1.77.<sup>[1]</sup> Structure solution was performed by direct methods and full-matrix-least-squares refinement against  $F^2$  using SHELXT<sup>[2]</sup> and SHELXL-2014<sup>[3]</sup> software. All non-hydrogen atoms were refined anisotropically, hydrogen atom positions were calculated.

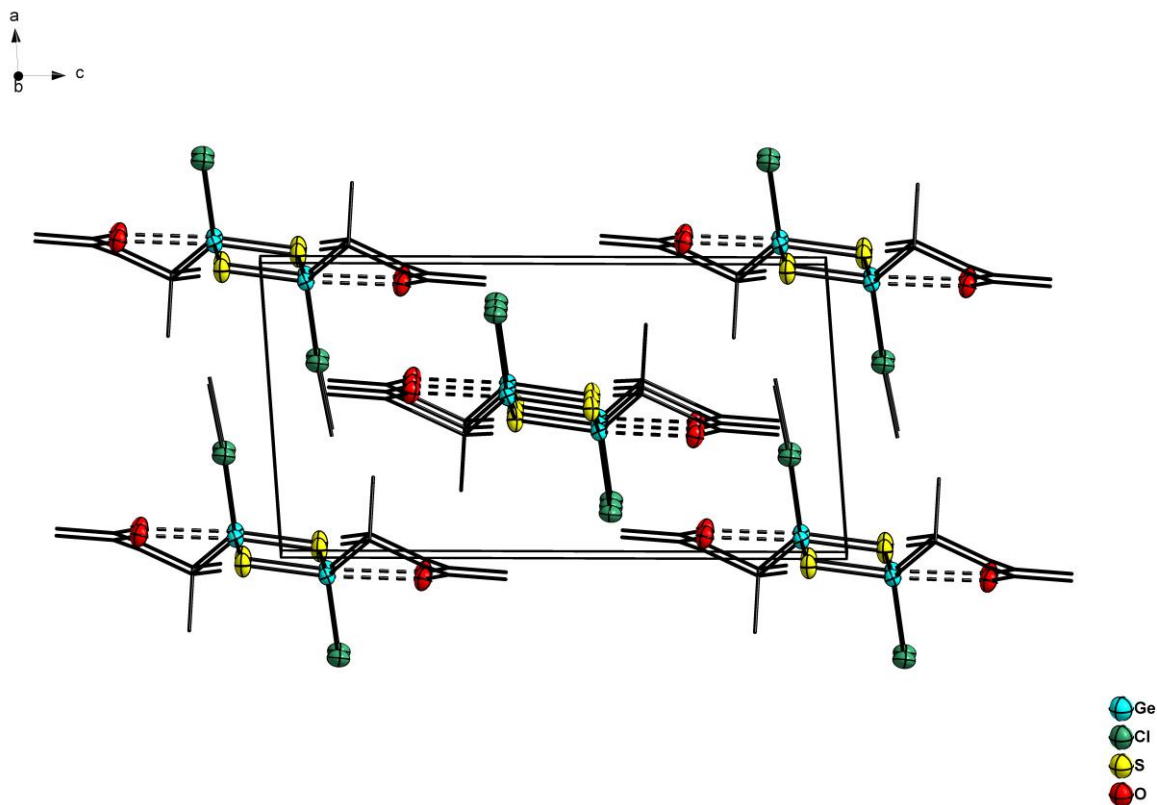

**Figure S21:** View of the crystal structure of **1** along the  $b$  axis.

**Table S1:** Crystal data and structure refinement for **1**.

---

|                                   |                                             |                           |
|-----------------------------------|---------------------------------------------|---------------------------|
| Empirical formula                 | $C_{12}H_{22}Cl_2Ge_2O_2S_2$                |                           |
| Formula weight                    | 478.49                                      |                           |
| Temperature                       | 100(2) K                                    |                           |
| Wavelength                        | 0.71073 Å                                   |                           |
| Crystal system                    | Monoclinic                                  |                           |
| Space group                       | $P2_1/n$                                    |                           |
| Unit cell dimensions              | $a = 7.6877(2)$ Å                           | $\alpha = 90^\circ$ .     |
|                                   | $b = 8.3778(3)$ Å                           | $\beta = 94.275(2)^\circ$ |
|                                   | $c = 14.7178(4)$ Å                          | $\gamma = 90^\circ$ .     |
| Volume                            | $945.28(5)$ Å <sup>3</sup>                  |                           |
| Z                                 | 2                                           |                           |
| Density (calculated)              | 1.681 Mg/m <sup>3</sup>                     |                           |
| Absorption coefficient            | 3.681 mm <sup>-1</sup>                      |                           |
| F(000)                            | 480                                         |                           |
| Crystal size                      | 0.34 x 0.22 x 0.12 mm <sup>3</sup>          |                           |
| Theta range for data collection   | 2.776 to 30.502°.                           |                           |
| Index ranges                      | -10 ≤ h ≤ 10, -11 ≤ k ≤ 11, -20 ≤ l ≤ 20    |                           |
| Reflections collected             | 21585                                       |                           |
| Independent reflections           | 2873 [R(int) = 0.0735]                      |                           |
| Completeness to theta = 25.242°   | 100.0 %                                     |                           |
| Absorption correction             | Integration                                 |                           |
| Max. and min. transmission        | 0.8295 and 0.3167                           |                           |
| Refinement method                 | Full-matrix least-squares on F <sup>2</sup> |                           |
| Data / restraints / parameters    | 2873 / 0 / 99                               |                           |
| Goodness-of-fit on F <sup>2</sup> | 1.058                                       |                           |
| Final R indices [I > 2σ(I)]       | R1 = 0.0283, wR2 = 0.0456                   |                           |
| R indices (all data)              | R1 = 0.0351, wR2 = 0.0478                   |                           |
| Largest diff. peak and hole       | 0.489 and -0.300 e.Å <sup>-3</sup>          |                           |

---

**Table S2:** Atomic coordinates ( $\times 10^4$ ) and equivalent isotropic displacement parameters ( $\text{\AA}^2 \times 10^3$ ) for **1**.  $U(\text{eq})$  is defined as one third of the trace of the orthogonalized  $U^{ij}$  tensor.

|       | x        | y        | z       | U(eq) |
|-------|----------|----------|---------|-------|
| C(1)  | 5641(2)  | 2475(2)  | 6591(1) | 20(1) |
| Ge(1) | 4387(1)  | 4050(1)  | 5785(1) | 17(1) |
| Ge(2) | 5453(16) | 3942(11) | 5901(7) | 16(3) |
| C(2)  | 5557(3)  | 864(2)   | 6103(1) | 30(1) |
| C(3)  | 7535(2)  | 3059(2)  | 6719(1) | 28(1) |
| C(6)  | 4308(3)  | 3903(2)  | 8945(1) | 36(1) |
| Cl(1) | 1605(1)  | 3813(1)  | 5888(1) | 31(1) |
| S(1)  | 5227(1)  | 6557(1)  | 5682(1) | 23(1) |
| C(4)  | 4806(2)  | 2325(2)  | 7496(1) | 25(1) |
| C(5)  | 4454(2)  | 3897(2)  | 7940(1) | 22(1) |
| O(1)  | 4268(2)  | 5102(1)  | 7481(1) | 26(1) |

**Table S3:** Bond lengths [ $\text{\AA}$ ] and angles [ $^\circ$ ] for **1**.

|                 |            |                      |             |
|-----------------|------------|----------------------|-------------|
| C(1)-C(4)       | 1.527(2)   | C(4)-C(1)-Ge(1)      | 111.10(10)  |
| C(1)-C(2)       | 1.5277(19) | C(2)-C(1)-Ge(1)      | 107.84(10)  |
| C(1)-C(3)       | 1.534(2)   | C(3)-C(1)-Ge(1)      | 106.07(10)  |
| C(1)-Ge(2)      | 1.594(10)  | C(1)-Ge(1)-Cl(1)     | 109.72(5)   |
| C(1)-Ge(1)      | 1.9768(14) | C(1)-Ge(1)-S(1)      | 122.99(4)   |
| Ge(1)-Cl(1)     | 2.1644(4)  | Cl(1)-Ge(1)-S(1)     | 112.839(17) |
| Ge(1)-S(1)      | 2.2057(4)  | C(1)-Ge(1)-S(1)#1    | 109.25(4)   |
| Ge(1)-S(1)#1    | 2.2600(4)  | Cl(1)-Ge(1)-S(1)#1   | 104.315(17) |
| Ge(2)-S(1)      | 2.219(10)  | S(1)-Ge(1)-S(1)#1    | 95.089(13)  |
| Ge(2)-S(1)#1    | 2.386(10)  | C(1)-Ge(2)-S(1)      | 148.9(6)    |
| C(6)-C(5)       | 1.492(2)   | C(1)-Ge(2)-S(1)#1    | 119.3(5)    |
| C(4)-C(5)       | 1.503(2)   | S(1)-Ge(2)-S(1)#1    | 91.3(4)     |
| C(5)-O(1)       | 1.2173(18) | Ge(1)-S(1)-Ge(1)#1   | 84.911(13)  |
| C(4)-C(1)-C(2)  | 109.38(12) | Ge(1)-S(1)-Ge(2)#1   | 81.7(2)     |
| C(4)-C(1)-C(3)  | 112.08(12) | Ge(1)#1-S(1)-Ge(2)#1 | 20.3(3)     |
| C(2)-C(1)-C(3)  | 110.25(13) | C(5)-C(4)-C(1)       | 114.09(12)  |
| C(4)-C(1)-Ge(2) | 126.5(4)   | O(1)-C(5)-C(6)       | 122.20(14)  |
| C(2)-C(1)-Ge(2) | 112.5(4)   | O(1)-C(5)-C(4)       | 120.21(13)  |
| C(3)-C(1)-Ge(2) | 82.7(4)    | C(6)-C(5)-C(4)       | 117.57(13)  |

Symmetry transformations used to generate equivalent atoms:

#1 -x+1,-y+1,-z+1

## 6. Single-crystal X-ray Crystallography of Compound 2

Compound **2** crystallizes as colorless blocks. Data of the X-Ray diffraction analyses were collected on a STOE IPDS 2T imaging plate diffractometer using  $\text{MoK}\alpha$  radiation with graphite monochromatization ( $\lambda = 0.71073 \text{ \AA}$ ) at 100 K. Reflection data were processed with X-Area 1.77.<sup>[1]</sup> Structure solution was performed by direct methods and full-matrix-least-squares refinement against  $F^2$  using SHELXT<sup>[2]</sup> and SHELXL-2014<sup>[3]</sup> software. All non-hydrogen atoms were refined anisotropically, hydrogen atom positions were calculated.

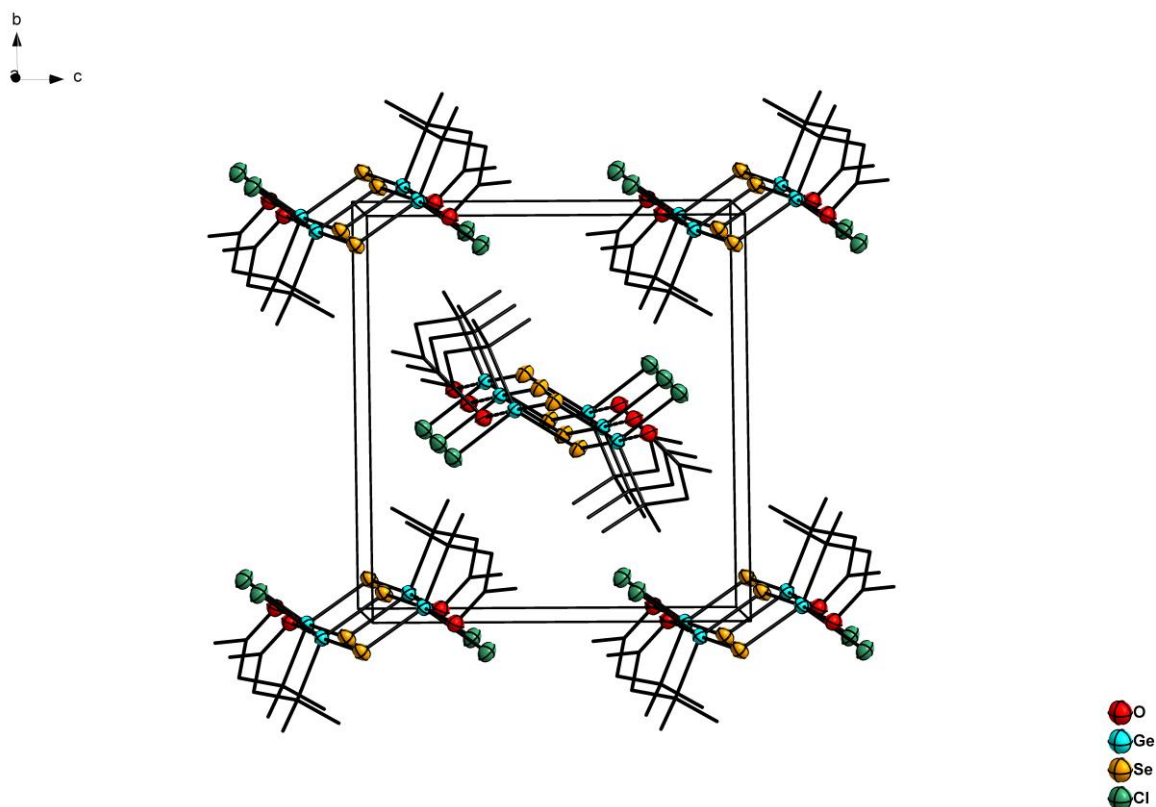

**Figure S22:** View of the crystal structure of **2** along the  $a$  axis.

**Table S4:** Crystal data and structure refinement for **2**.

---

|                                   |                                                                                                |                 |
|-----------------------------------|------------------------------------------------------------------------------------------------|-----------------|
| Empirical formula                 | C <sub>12</sub> H <sub>22</sub> Cl <sub>2</sub> Ge <sub>2</sub> O <sub>2</sub> Se <sub>2</sub> |                 |
| Formula weight                    | 572.29                                                                                         |                 |
| Temperature                       | 100(2) K                                                                                       |                 |
| Wavelength                        | 0.71073 Å                                                                                      |                 |
| Crystal system                    | Monoclinic                                                                                     |                 |
| Space group                       | <i>P</i> 2 <sub>1</sub> / <i>n</i>                                                             |                 |
| Unit cell dimensions              | a = 8.1795(5) Å                                                                                | α = 90°         |
|                                   | b = 11.2847(6) Å                                                                               | β = 104.226(5)° |
|                                   | c = 10.6812(6) Å                                                                               | γ = 90°         |
| Volume                            | 955.67(10) Å <sup>3</sup>                                                                      |                 |
| Z                                 | 2                                                                                              |                 |
| Density (calculated)              | 1.989 Mg/m <sup>3</sup>                                                                        |                 |
| Absorption coefficient            | 7.231 mm <sup>-1</sup>                                                                         |                 |
| F(000)                            | 552                                                                                            |                 |
| Crystal size                      | 0.22 x 0.17 x 0.11 mm <sup>3</sup>                                                             |                 |
| Theta range for data collection   | 2.670 to 26.731°.                                                                              |                 |
| Index ranges                      | -10 ≤ h ≤ 10, -14 ≤ k ≤ 13, -13 ≤ l ≤ 13                                                       |                 |
| Reflections collected             | 7041                                                                                           |                 |
| Independent reflections           | 2019 [R(int) = 0.0532]                                                                         |                 |
| Completeness to theta = 25.242°   | 99.5 %                                                                                         |                 |
| Absorption correction             | Integration                                                                                    |                 |
| Max. and min. transmission        | 0.3910 and 0.2254                                                                              |                 |
| Refinement method                 | Full-matrix least-squares on F <sup>2</sup>                                                    |                 |
| Data / restraints / parameters    | 2019 / 0 / 94                                                                                  |                 |
| Goodness-of-fit on F <sup>2</sup> | 1.070                                                                                          |                 |
| Final R indices [I > 2σ(I)]       | R1 = 0.0236, wR2 = 0.0544                                                                      |                 |
| R indices (all data)              | R1 = 0.0281, wR2 = 0.0557                                                                      |                 |
| Largest diff. peak and hole       | 0.500 and -0.637 e.Å <sup>-3</sup>                                                             |                 |

---



**Table S5:** Atomic coordinates ( $\times 10^4$ ) and equivalent isotropic displacement parameters ( $\text{\AA}^2 \times 10^3$ ) for **2**.  $U(\text{eq})$  is defined as one third of the trace of the orthogonalized  $U^{ij}$  tensor.

|       | x       | y       | z       | U(eq) |
|-------|---------|---------|---------|-------|
| C(1)  | 4089(3) | 3078(2) | 6992(2) | 22(1) |
| C(2)  | 2888(3) | 2464(2) | 5855(3) | 25(1) |
| C(3)  | 5723(3) | 2379(2) | 7447(3) | 27(1) |
| C(4)  | 3255(3) | 3252(2) | 8109(3) | 24(1) |
| C(5)  | 1829(3) | 4136(2) | 7848(3) | 23(1) |
| C(6)  | 535(3)  | 4016(3) | 8621(3) | 33(1) |
| O(1)  | 1769(2) | 4914(2) | 7057(2) | 26(1) |
| Ge(1) | 4700(1) | 4620(1) | 6339(1) | 20(1) |
| Se(1) | 2971(1) | 5642(1) | 4611(1) | 24(1) |
| Cl(1) | 5659(1) | 5755(1) | 8029(1) | 29(1) |

**Table S6:** Bond lengths [ $\text{\AA}$ ] and angles [ $^\circ$ ] for **2**.

|                 |            |                                                                |            |
|-----------------|------------|----------------------------------------------------------------|------------|
| C(1)-C(4)       | 1.525(3)   | C(5)-C(4)-C(1)                                                 | 114.5(2)   |
| C(1)-C(3)       | 1.525(3)   | O(1)-C(5)-C(6)                                                 | 122.4(2)   |
| C(1)-C(2)       | 1.528(4)   | O(1)-C(5)-C(4)                                                 | 120.4(2)   |
| C(1)-Ge(1)      | 1.984(2)   | C(6)-C(5)-C(4)                                                 | 117.2(2)   |
| C(4)-C(5)       | 1.508(3)   | C(1)-Ge(1)-Cl(1)                                               | 107.02(8)  |
| C(5)-O(1)       | 1.212(3)   | C(1)-Ge(1)-Se(1)                                               | 123.73(7)  |
| C(5)-C(6)       | 1.500(3)   | Cl(1)-Ge(1)-Se(1)                                              | 112.73(2)  |
| Ge(1)-Cl(1)     | 2.1951(7)  | C(1)-Ge(1)-Se(1)#1                                             | 109.70(7)  |
| Ge(1)-Se(1)     | 2.3354(4)  | Cl(1)-Ge(1)-Se(1)#1                                            | 105.11(2)  |
| Ge(1)-Se(1)#1   | 2.3866(3)  | Se(1)-Ge(1)-Se(1)#1                                            | 96.696(13) |
| C(4)-C(1)-C(3)  | 110.0(2)   | Ge(1)-Se(1)-Ge(1)#1                                            | 83.304(13) |
| C(4)-C(1)-C(2)  | 110.9(2)   | Symmetry transformations used to generate<br>equivalent atoms: |            |
| C(3)-C(1)-C(2)  | 111.1(2)   | #1 -x+1,-y+1,-z+1                                              |            |
| C(4)-C(1)-Ge(1) | 111.23(16) |                                                                |            |
| C(3)-C(1)-Ge(1) | 106.79(16) |                                                                |            |
| C(2)-C(1)-Ge(1) | 106.67(16) |                                                                |            |

## 7. Single-crystal X-ray Crystallography of Compound 3

Compound **3** crystallizes in the shape of orange blocks. Data of the X-Ray diffraction analysis was collected on a STOE STADIVARI diffractometer using Cu K $\alpha$  radiation ( $\lambda = 1.54186 \text{ \AA}$ ) from an X-ray micro source with X-ray optics and a Pilatus 300K Si hybrid pixel array detector at 100 K. Reflection data were processed with X-Area 1.77.<sup>[1]</sup> Structure solution was performed by direct methods and full-matrix-least-squares refinement against  $F^2$  using SHELXT<sup>[2]</sup> and SHELXL-2014<sup>[3]</sup> software. All non-hydrogen atoms were refined anisotropically, hydrogen atom positions were calculated.

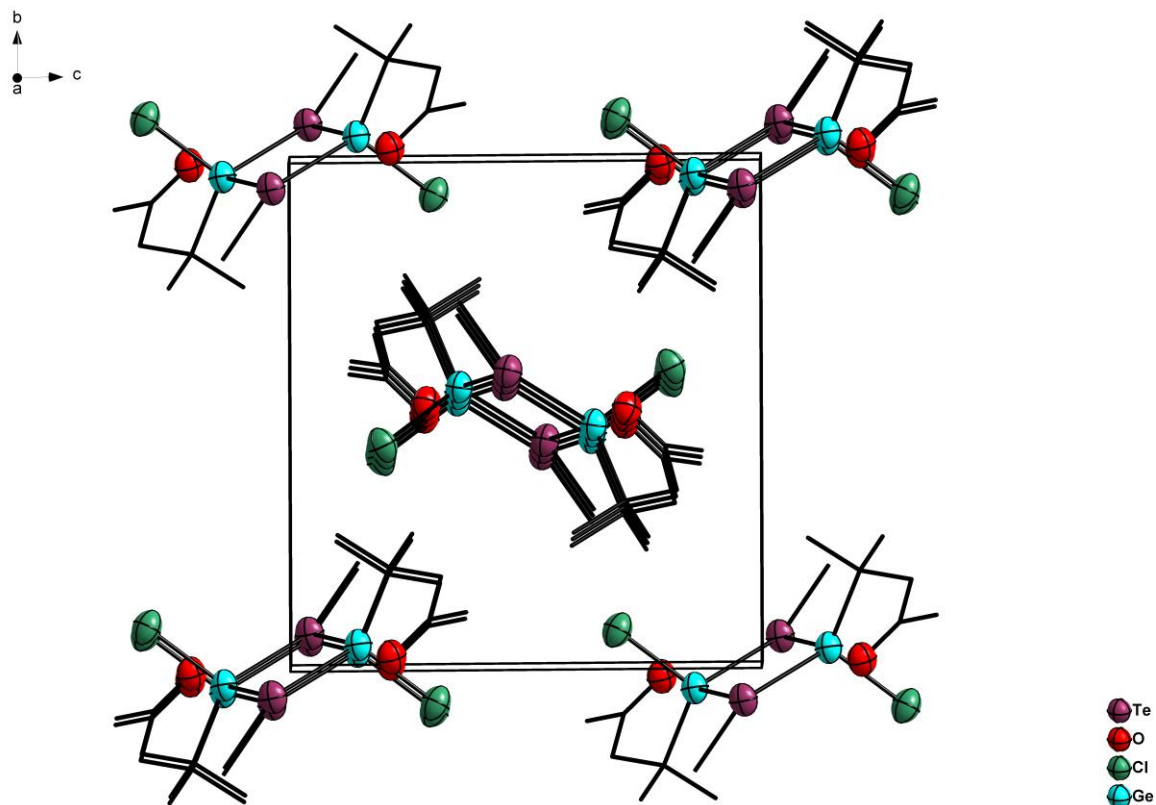

**Figure S23:** View of the crystal structure of **3** along the  $a$  axis.

**Table S7:** Crystal data and structure refinement for **3<sub>z</sub>**

---

|                                   |                                                                                                |                 |
|-----------------------------------|------------------------------------------------------------------------------------------------|-----------------|
| Empirical formula                 | C <sub>12</sub> H <sub>22</sub> Cl <sub>2</sub> Ge <sub>2</sub> O <sub>2</sub> Te <sub>2</sub> |                 |
| Formula weight                    | 669.57                                                                                         |                 |
| Temperature                       | 100(2) K                                                                                       |                 |
| Wavelength                        | 1.54178 Å                                                                                      |                 |
| Crystal system                    | Monoclinic                                                                                     |                 |
| Space group                       | <i>P</i> 2 <sub>1</sub> / <i>n</i>                                                             |                 |
| Unit cell dimensions              | a = 8.2073(3) Å                                                                                | α = 90°         |
|                                   | b = 11.4851(4) Å                                                                               | β = 104.500(3)° |
|                                   | c = 10.9961(4) Å                                                                               | γ = 90°         |
| Volume                            | 1003.50(6) Å <sup>3</sup>                                                                      |                 |
| Z                                 | 2                                                                                              |                 |
| Density (calculated)              | 2.216 Mg/m <sup>3</sup>                                                                        |                 |
| Absorption coefficient            | 28.612 mm <sup>-1</sup>                                                                        |                 |
| F(000)                            | 624                                                                                            |                 |
| Crystal size                      | 0.1 x 0.1 x 0.1 mm <sup>3</sup>                                                                |                 |
| Theta range for data collection   | 5.666 to 74.860°                                                                               |                 |
| Index ranges                      | -10 ≤ h ≤ 9, -14 ≤ k ≤ 14, -11 ≤ l ≤ 13                                                        |                 |
| Reflections collected             | 2037                                                                                           |                 |
| Independent reflections           | 2037 [R(int) = 0.0301]                                                                         |                 |
| Completeness to theta = 25.242°   | 99.7 %                                                                                         |                 |
| Absorption correction             | Sphere                                                                                         |                 |
| Max. and min. transmission        | 0.25191 and 0.0000                                                                             |                 |
| Refinement method                 | Full-matrix least-squares on F <sup>2</sup>                                                    |                 |
| Data / restraints / parameters    | 2037 / 0 / 95                                                                                  |                 |
| Goodness-of-fit on F <sup>2</sup> | 1.404                                                                                          |                 |
| Final R indices [I > 2σ(I)]       | R1 = 0.0539, wR2 = 0.1564                                                                      |                 |
| R indices (all data)              | R1 = 0.0596, wR2 = 0.1692                                                                      |                 |
| Largest diff. peak and hole       | 1.946 and -2.747 e.Å <sup>-3</sup>                                                             |                 |

---

**Table S8:** Atomic coordinates ( $\times 10^4$ ) and equivalent isotropic displacement parameters ( $\text{\AA}^2 \times 10^3$ ) for **3**.  $U(\text{eq})$  is defined as one third of the trace of the orthogonalized  $U^{ij}$  tensor.

|        | x        | y       | z       | U(eq) |
|--------|----------|---------|---------|-------|
| Te(01) | 2748(1)  | 4347(1) | 4601(1) | 31(1) |
| Ge(02) | 4756(1)  | 5383(1) | 6421(1) | 29(1) |
| Cl(03) | 5670(3)  | 4240(2) | 8063(2) | 39(1) |
| O(004) | 1739(7)  | 5111(5) | 7119(5) | 38(1) |
| C(005) | 623(11)  | 5960(9) | 8695(9) | 44(2) |
| C(006) | 5780(10) | 7575(8) | 7576(8) | 41(2) |
| C(007) | 1883(9)  | 5838(7) | 7922(8) | 31(2) |
| C(008) | 2969(10) | 7528(7) | 5989(7) | 35(2) |
| C(009) | 4112(9)  | 6890(7) | 7086(7) | 32(2) |
| C(00A) | 3308(9)  | 6700(7) | 8176(7) | 34(2) |

**Table S9:** Bond lengths [ $\text{\AA}$ ] and angles [ $^\circ$ ] for **3**.

|                        |            |                                                                |          |
|------------------------|------------|----------------------------------------------------------------|----------|
| Te(01)-Ge(02)          | 2.5466(9)  | Te(01)-Ge(02)-Te(01)#1                                         | 98.13(3) |
| Te(01)-Ge(02)#1        | 2.5896(10) | O(004)-C(007)-C(005)                                           | 121.8(8) |
| Ge(02)-C(009)          | 2.001(8)   | O(004)-C(007)-C(00A)                                           | 121.6(7) |
| Ge(02)-Cl(03)          | 2.207(2)   | C(005)-C(007)-C(00A)                                           | 116.5(7) |
| O(004)-C(007)          | 1.199(10)  | C(008)-C(009)-C(00A)                                           | 113.0(6) |
| C(005)-C(007)          | 1.501(11)  | C(008)-C(009)-C(006)                                           | 110.3(7) |
| C(006)-C(009)          | 1.553(10)  | C(00A)-C(009)-C(006)                                           | 108.5(6) |
| C(007)-C(00A)          | 1.505(10)  | C(008)-C(009)-Ge(02)                                           | 107.1(5) |
| C(008)-C(009)          | 1.518(10)  | C(00A)-C(009)-Ge(02)                                           | 111.7(6) |
| C(009)-C(00A)          | 1.522(11)  | C(006)-C(009)-Ge(02)                                           | 105.9(5) |
| Ge(02)-Te(01)-Ge(02)#1 | 81.87(3)   | C(007)-C(00A)-C(009)                                           | 114.7(7) |
| C(009)-Ge(02)-Cl(03)   | 106.4(2)   | Symmetry transformations used to generate<br>equivalent atoms: |          |
| C(009)-Ge(02)-Te(01)   | 120.9(2)   | #1 -x+1,-y+1,-z+1                                              |          |
| Cl(03)-Ge(02)-Te(01)   | 112.68(7)  |                                                                |          |
| C(009)-Ge(02)-Te(01)#1 | 111.4(2)   |                                                                |          |
| Cl(03)-Ge(02)-Te(01)#1 | 106.38(7)  |                                                                |          |

## 7. References for the Supporting Information

- [1] Stoe and Cie GmbH, *X-Area, Version 1.77*, 2016.
- [2] G. M. Sheldrick, *Acta Crystallogr. A*, 2015, **71**, 3.
- [3] C. B. Hübschle, G. M. Sheldrick, B. Dittrich, *J. Appl. Cryst.*, 2011, 1281.
